# Supplementary material for: Interparticle distance as a key factor for controlling the dual-emission properties of carbon dots
Source: Royal Society of Chemistry journal article supplement (doi:10.1039/d0cp02120b), 2020-01-01
Supplement: d0cp02120b1.pdf [file d0cp02120b1.pdf]

## Supporting information

### Interparticle distance as a key factor for controlling the dual-emission properties of carbon dots

Hyo Jeong Yoo, Byeong Eun Kwak and Do Hyun Kim\*

Department of Chemical & Biomolecular engineering, Korea Advanced institute of Science and Technology (KAIST), 291 Daehak-ro, Yuseong-gu, Daejeon 34141, Republic of Korea.

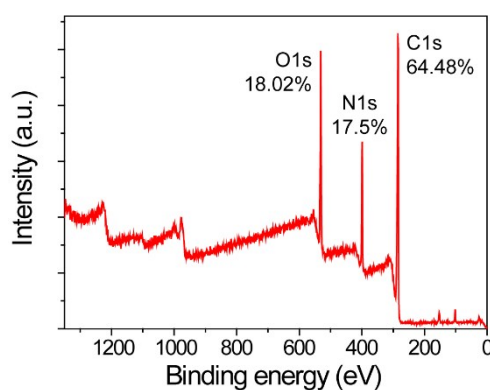

**Fig. S1** XPS survey scan spectrum of the CDs.

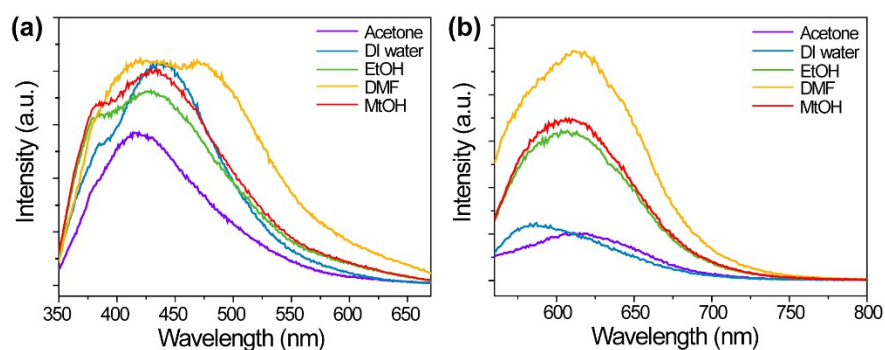

**Fig. S2** PL spectra of the CD solutions dissolved in DMF excited at (a) 340 nm and (b) 550 nm. The solution concentration was fixed at 0.01 mg/mL.

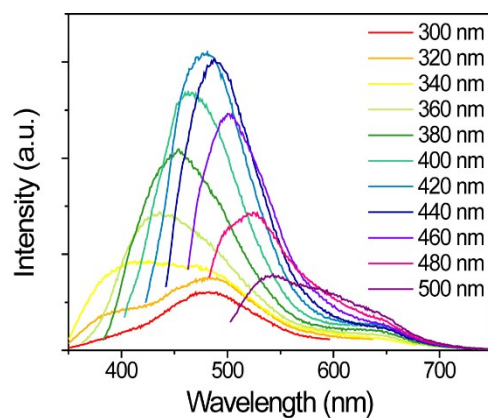

**Fig. S3** Excitation dependent PL spectra of the CDs dissolved in DMF with the concentration of 0.01 mg/mL.

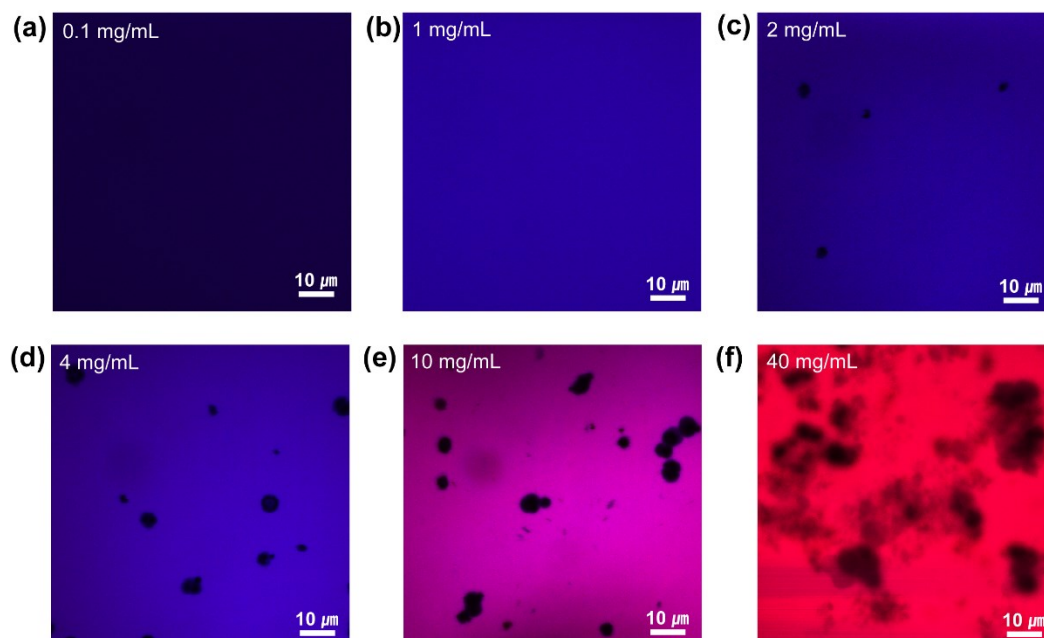

**Fig.S4** Confocal laser scanning microscopy images of the CD solutions with the concentration of (a) 0.1, (b) 1, (c) 2, (d) 4, (e) 10, and (f) 40 mg/mL dissolved in DMF under 405 nm excitation.

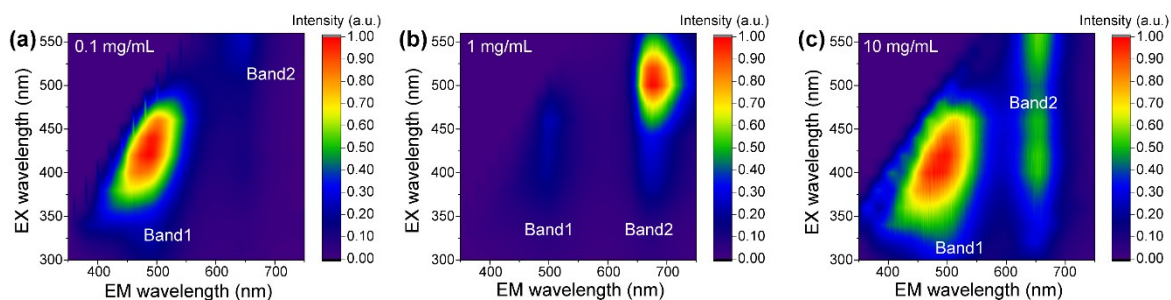

**Fig. S5** PL maps of the dialyzed CD solutions dissolved in DMF with the concentrations of (a) 0.1, (b) 1, and (c) 10 mg/mL.

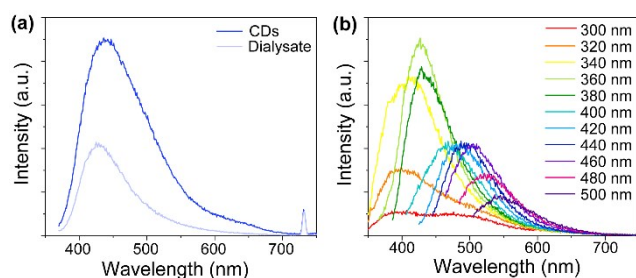

**Fig. S6** (a) PL spectra of the CDs and dialysate under 365 nm excitation and (b) excitation-dependent PL spectra of the dialysate. All of the solution concentration was fixed at 0.01 mg/mL dissolved in DMF.

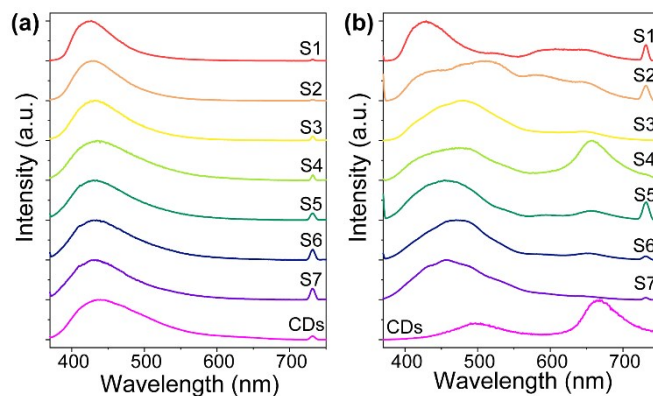

**Fig. S7** PL spectra of S1, S2, S3, S4, S5, S6, S7, and the CDs with the concentration of (a) 0.01 mg/mL and (b) 1 mg/mL dissolved in DMF under 365 nm excitation.

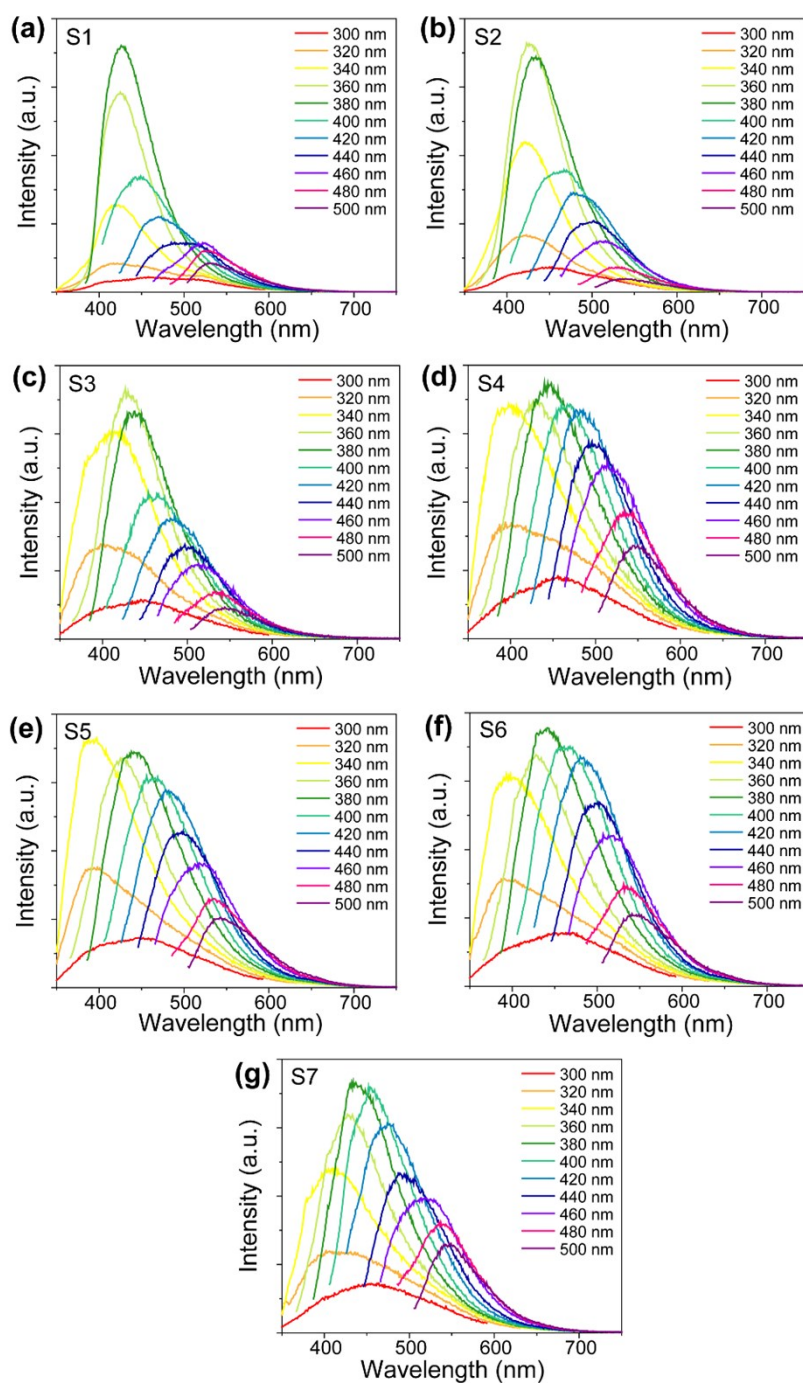

**Fig. S8** PL spectra of (a) S1, (b) S2, (c) S3, (d) S4, (e) S5, (f) S6, and (g) S7 with the concentration of 0.01 mg/mL dissolved in DMF under different excitation wavelengths ranging from 300 to 500 nm with the increment of 20 nm.

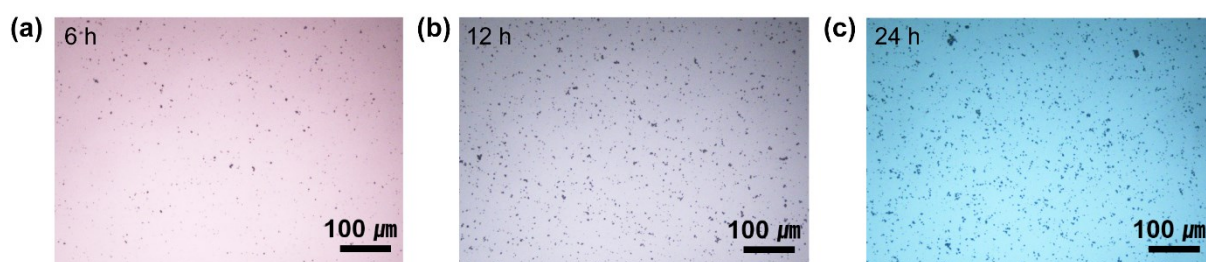

**Fig. S9** Fluorescence microscope images of the CDs synthesized with different reaction time of (a) 6 h, (b) 12 h, and (c) 24 h.

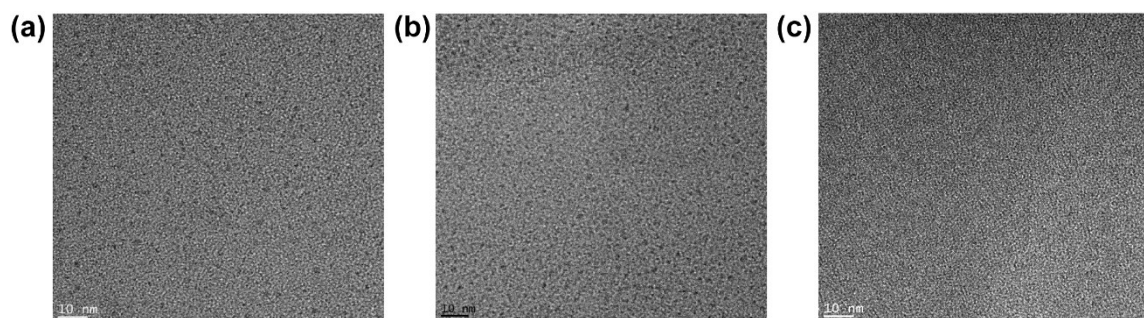

**Fig. S10** TEM images of the CDs synthesized with different reaction times of (a) 6 h, (b) 12 h, and (c) 24 h.

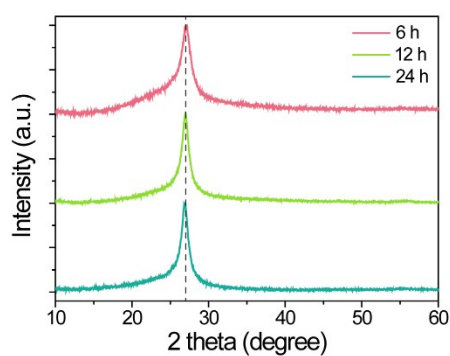

**Fig. S11** XRD patterns of the CDs with different reaction times.



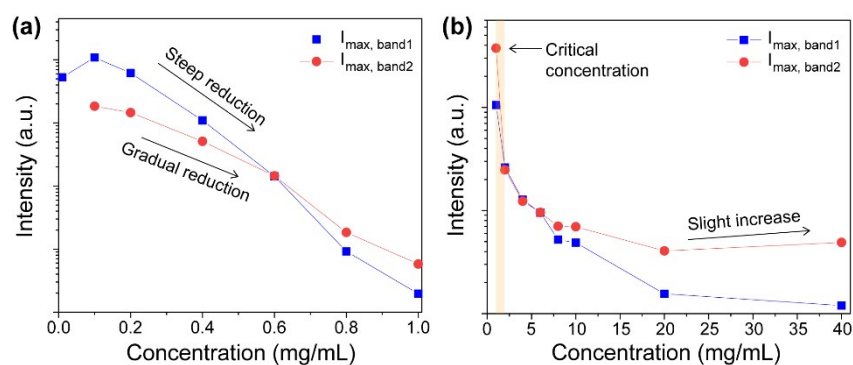

**Fig. S12** Concentration-dependent change of emission intensity maxima of band 1 and band 2 under (a) low concentration region from 0.01 to 1 mg/mL and (b) high concentration region from 1 to 40 mg/mL. The concentration of 1 mg/mL case was added in the high concentration region for comparison.

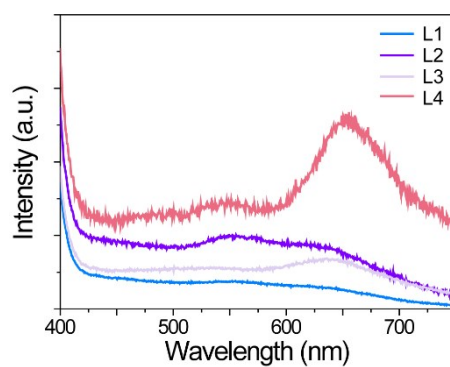

**Fig. S13** PL spectra of the fabricated WLEDs with different concentrations of the CDs.

| Conc. (mg/mL) | $\tau_1$ (ns) | $A_1$ (%) | $\tau_2$ (ns) | $A_2$ (%) | $\tau_{avg.}$ (ns) |
|---------------|---------------|-----------|---------------|-----------|--------------------|
| 0.01          | 2.7455        | 35.71     | 7.5477        | 64.29     | 6.741              |
| 0.1           | 3.0466        | 36.69     | 7.7684        | 63.31     | 6.894              |
| 0.2           | 3.1864        | 32.84     | 7.9989        | 67.16     | 7.214              |
| 0.4           | 3.8764        | 31.95     | 9.0424        | 68.05     | 8.176              |
| 0.6           | 3.8714        | 23.2      | 9.0499        | 76.8      | 8.458              |

**Table. S1** PL lifetime results of the CD solutions with different concentrations dissolved in DMF excited at 375 nm.

| LED | Chromaticity coordinate | CCT(K) | CRI  |
|-----|-------------------------|--------|------|
| L1  | (0.301, 0.298)          | 7738   | 93.6 |
| L2  | (0.324, 0.326)          | 5900   | 95.3 |
| L3  | (0.338, 0.321)          | 5196   | 86.8 |
| L4  | (0.375, 0.335)          | 3794   | 77   |

**Table. S2** Photoelectric parameters of the CD-based WLEDs of L1, L2, L3, and L4.
